# Supplementary material
Source: MDPI journal article supplement (https://www.mdpi.com/2073-4395/13/6/1592)
Supplement: s1 [file s1]

**Table S1.** qRT-PCR primer sequences of candidate genes.

| <b>GENE ID</b>         | <b>Primer sequence (Upstream)</b> | <b>Primer sequence (Downstream)</b> |
|------------------------|-----------------------------------|-------------------------------------|
| Tua-5                  | F:GCGGCACCTATCTGTTTGTTT           | R:ACACCTTGACCTCAACACAGT             |
| <i>Glyma.14g029100</i> | F:GCCCAGGCACTCAGGTATCT            | R:ATGGATGCAACAAGAGGGCT              |
| <i>Glyma.14g029500</i> | F:CTTGATGAGGTCATTCAGGAAGGTG       | R:TCACAGGCAACACCATATATGACA          |
| <i>Glyma.14g030100</i> | F:TCGAGGTGCTCAGGTGTATG            | R:AGTGCCACGTGTCATAGCAA              |
| <i>Glyma.14g030500</i> | F:TTGCAATCACCGCACAAA              | R:TATCATCGCAGGACTTGGTGA             |
| <i>Glyma.14g030600</i> | F:CTGGGGGAATCATATCATCACAAA        | R:CTGCAGCTCGCGGAAG                  |
| <i>Glyma.14g030700</i> | F:TCCATGGGATCTTCCAATGAGTT         | R:AGGCTTGTCAATCCCTGTGG              |

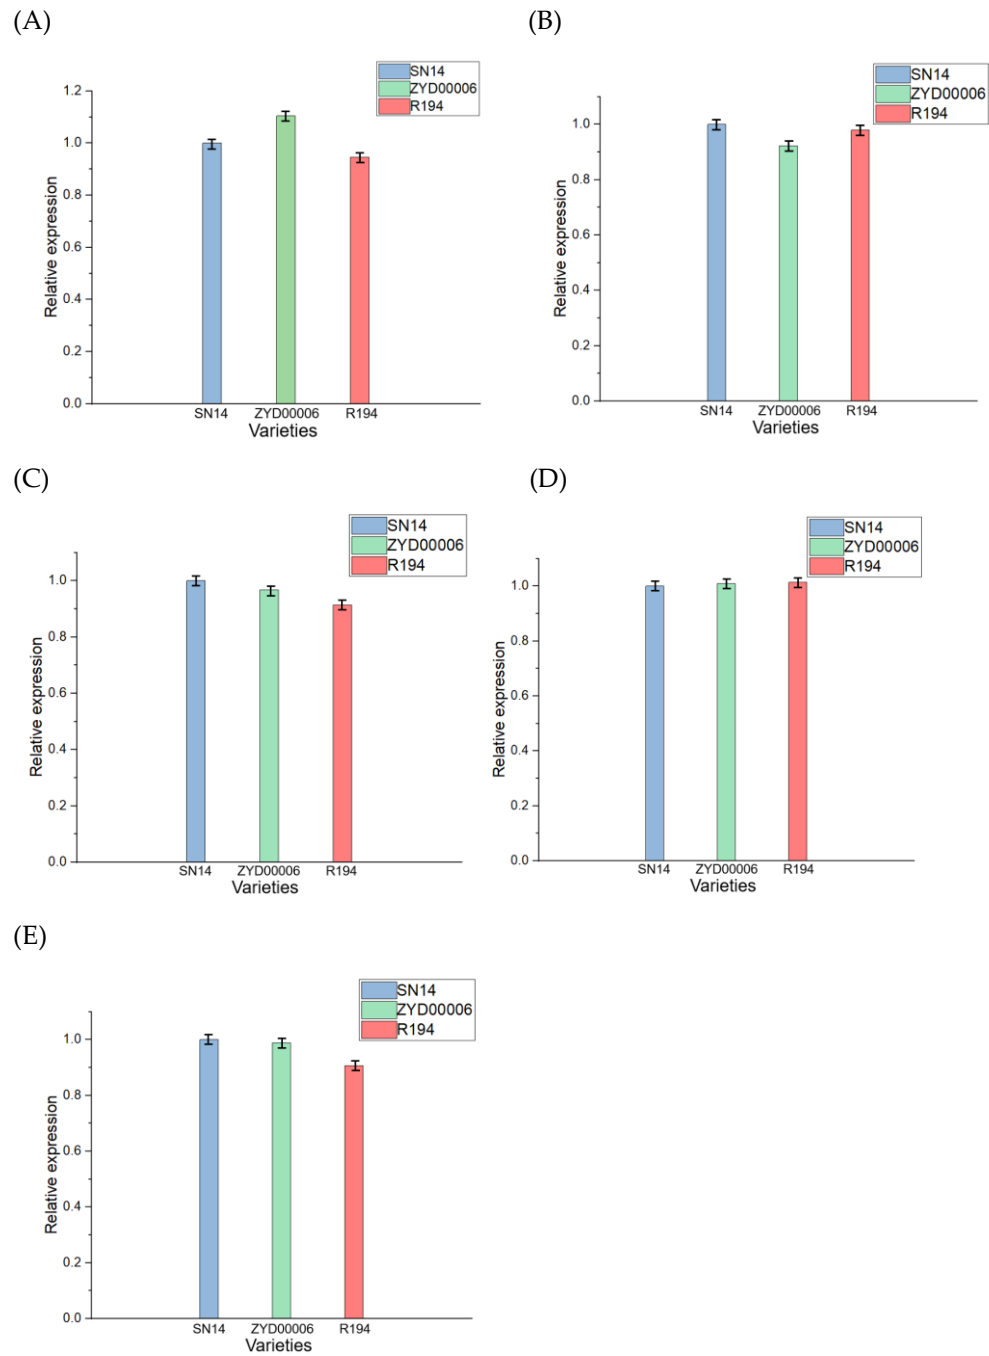

**Figure S1.** The relative transcription level of other candidate genes in leaves of parents and lines with high sucrose content at V4 stage. (A): *GLYMA.14G029500*; (B): *GLYMA.14G030100*; (C): *GLYMA.14G030500*; (D): *GLYMA.14G030600*; (E): *GLYMA.14G030700*.
